# Supplementary material for: Driving a sustainable application of s-triazine ametryn and atrazine herbicides through multicomponent crystals with improved solubility
Source: Royal Society of Chemistry journal article supplement (doi:10.1039/d1ce00356a), 2021-01-01

## Driving a sustainable application of s-triazines Ametryn and Atrazine herbicides through multicomponent crystals with improved solubility

Amandha Kaiser da Silva<sup>a</sup>, Luan F. Diniz<sup>b</sup>, Juan C. Tenorio<sup>c</sup>, Carlos E. D. Nazario<sup>a</sup>, Caue Ribeiro<sup>d</sup>, Paulo de Sousa Carvalho Jr<sup>e\*</sup>

<sup>a</sup>Instituto de Química, Universidade Federal do Mato Grosso do Sul, 79074-460, Campo Grande, MS, Brazil. <sup>b</sup>Laboratório de Controle de Qualidade, Departamento de Produtos Farmacêuticos, Faculdade de Farmácia, Universidade Federal de Minas Gerais, 31270-901, Belo Horizonte, MG, Brazil. <sup>c</sup>Instituto de Química, Universidade Estadual de Campinas, 13083-970, Campinas, SP, Brazil. <sup>d</sup>National Nanotechnology Laboratory for Agribusiness (LNNA), EMBRAPA Instrumentação, 13560-970, São Carlos, SP, Brazil. <sup>e</sup>Instituto de Física, Universidade Federal do Mato Grosso do Sul, 79070-900, Campo Grande, MS, Brazil. \*e-mail: [paulo.sousa@ufms.br](mailto:paulo.sousa@ufms.br)

**Table S1.** Crystal data and structure refinement parameters for the s-triazine organic salts.

|                                             | ATZ-H <sub>2</sub> Fum·H <sub>2</sub> O                               | ATZ-H <sub>2</sub> Fum                                           | AMT-NO <sub>3</sub>                                                 | AMT-TFA                                                                        |
|---------------------------------------------|-----------------------------------------------------------------------|------------------------------------------------------------------|---------------------------------------------------------------------|--------------------------------------------------------------------------------|
| Empirical formula                           | C <sub>10</sub> H <sub>16.22</sub> ClN <sub>5</sub> O <sub>2.11</sub> | C <sub>10</sub> H <sub>16</sub> ClN <sub>5</sub> O <sub>2</sub>  | C <sub>9</sub> H <sub>18</sub> N <sub>6</sub> O <sub>3</sub> S      | C <sub>11</sub> H <sub>18</sub> F <sub>3</sub> N <sub>5</sub> O <sub>2</sub> S |
| Formula weight                              | 275.71                                                                | 273.73                                                           | 290.35                                                              | 341.36                                                                         |
| Temperature (K)                             | 120.0                                                                 | 120.0                                                            | 298.0                                                               | 298.0                                                                          |
| Crystal system                              | Monoclinic                                                            | Monoclinic                                                       | Triclinic                                                           | Monoclinic                                                                     |
| Space group                                 | C2/c                                                                  | C2/c                                                             | <i>P</i> $\bar{1}$                                                  | <i>P</i> 2 <sub>1</sub> /c                                                     |
| a/Å                                         | 18.892(4)                                                             | 18.922(13)                                                       | 9.1659(7)                                                           | 8.2238(3)                                                                      |
| b/Å                                         | 6.2547(15)                                                            | 6.297(4)                                                         | 9.5067(8)                                                           | 10.1689(3)                                                                     |
| c/Å                                         | 24.173(6)                                                             | 24.311(16)                                                       | 9.6825(8)                                                           | 19.8066(5)                                                                     |
| α/°                                         | 90                                                                    | 90                                                               | 77.541(7)                                                           | 90                                                                             |
| β/°                                         | 104.589(4)                                                            | 104.748(6)                                                       | 72.346(7)                                                           | 99.017(3)                                                                      |
| γ/°                                         | 90                                                                    | 90                                                               | 67.479(7)                                                           | 90                                                                             |
| Volume/Å <sup>3</sup>                       | 2764.3(11)                                                            | 2801(3)                                                          | 737.90(11)                                                          | 1635.90(9)                                                                     |
| Z                                           | 8                                                                     | 8                                                                | 2                                                                   | 4                                                                              |
| ρ <sub>calc</sub> /cm <sup>3</sup>          | 1.325                                                                 | 1.298                                                            | 1.307                                                               | 1.386                                                                          |
| μ/mm <sup>-1</sup>                          | 0.281                                                                 | 0.276                                                            | 0.234                                                               | 0.241                                                                          |
| F(000)                                      | 1161.0                                                                | 1152.0                                                           | 308.0                                                               | 712.0                                                                          |
| Crystal size/mm <sup>3</sup>                | 0.222 × 0.14 × 0.08                                                   | 0.239 × 0.149 × 0.052                                            | 0.52 × 0.38 × 0.3                                                   | 0.34 × 0.22 × 0.03                                                             |
| 2θ range for data collection/°              | 6.31 to 53.46                                                         | 6.3 to 52.724                                                    | 6.802 to 53.438                                                     | 6.988 to 54.968                                                                |
| Index ranges                                | -23 ≤ h ≤ 23,<br>-7 ≤ k ≤ 7,<br>-30 ≤ l ≤ 30                          | -22 ≤ h ≤ 23,<br>-7 ≤ k ≤ 7,<br>-30 ≤ l ≤ 30                     | -11 ≤ h ≤ 11,<br>-12 ≤ k ≤ 11,<br>-12 ≤ l ≤ 12                      | -10 ≤ h ≤ 10,<br>-11 ≤ k ≤ 13,<br>-25 ≤ l ≤ 25                                 |
| Reflections collected                       | 28552                                                                 | 38166                                                            | 15139                                                               | 20777                                                                          |
| Independent reflections                     | 2928 [R <sub>int</sub> =<br>0.2164, R <sub>sigma</sub> =<br>0.0811]   | 2851 [R <sub>int</sub> = 0.0743,<br>R <sub>sigma</sub> = 0.0306] | 3125 [R <sub>int</sub> =<br>0.0288, R <sub>sigma</sub> =<br>0.0198] | 3703 [R <sub>int</sub> =<br>0.0320, R <sub>sigma</sub> =<br>0.0236]            |
| Data/restraints/parameters                  | 2928/36/179                                                           | 2851/36/167                                                      | 3125/58/204                                                         | 3703/0/203                                                                     |
| Goodness-of-fit on F <sup>2</sup>           | 1.079                                                                 | 1.093                                                            | 1.046                                                               | 1.041                                                                          |
| Final R indexes [I >= 2σ (I)]               | R1= 0.0865,<br>wR2= 0.22249                                           | R1= 0.0889, wR2=<br>0.2619                                       | R1= 0.0657,<br>wR2= 0.1806                                          | R1= 0.0711, wR2=<br>0.2156                                                     |
| Final R indexes [all data]                  | R1= 0.0972,<br>wR2= 0.2348                                            | R1= 0.0984, wR2=<br>0.2714                                       | R1= 0.0861,<br>wR2= 0.1951                                          | R1= 0.0948, wR2=<br>0.2365                                                     |
| Largest diff. peak/hole / e Å <sup>-3</sup> | 0.65/-0.89                                                            | 0.84/-1.27                                                       | 0.34/-0.24                                                          | 0.92/-0.45                                                                     |

**Table S2.** H-bond and intermolecular interactions for the s-triazine organic salts.

| D–H•••A                                    | H•••A    | D•••A    | D–H•••A   | Symmetry code                |
|--------------------------------------------|----------|----------|-----------|------------------------------|
| <b>ATZ-H<sub>2</sub>Fum·H<sub>2</sub>O</b> |          |          |           |                              |
| O1–H1•••N1                                 | 2.674(4) | 1.859(3) | 172.17(2) | <i>x,y,z</i>                 |
| N2–H2•••O2                                 | 2.931(5) | 2.079(3) | 170.61(2) | <i>x,y,z</i>                 |
| C7–H7C•••OW1                               | 3.222(3) | 2.273(3) | 169.40(8) | <i>x,y,z</i>                 |
| OW1–HW1B•••N3                              | 3.388(3) | 2.709(3) | 137.99(2) | <i>x,y,z</i>                 |
| N5–H5•••N4                                 | 3.040(4) | 2.181(3) | 176.78(2) | $-x+2, +y, -z+1/2+1$         |
| C10–H10•••OW1                              | 3.622(3) | 2.865(3) | 139.37(7) | $-x+1/2+1, +y-1/2, -z+1/2+1$ |
| C5–H5C•••O2                                | 3.624(6) | 2.705(3) | 160.45(3) | $x+1/2, +y-1/2, +z$          |
| <b>ATZ-H<sub>2</sub>Fum</b>                |          |          |           |                              |
| N2–H2•••O2                                 | 2.943(6) | 2.091(4) | 170.69(3) | <i>x,y,z</i>                 |
| O1–H1•••N1                                 | 2.686(5) | 1.871(4) | 172.58(2) | <i>x,y,z</i>                 |
| N5–H5•••N4                                 | 3.047(5) | 2.187(3) | 177.67(3) | $-x, +y, -z+1/2$             |
| C5–H5A•••O2                                | 3.633(7) | 2.712(4) | 161.13(4) | $x-1/2, +y-1/2, +z$          |
| <b>AMT-NO<sub>3</sub></b>                  |          |          |           |                              |
| N1–H1•••O1                                 | 2.748(3) | 1.890(2) | 175.78(2) | <i>x,y,z</i>                 |
| N1–H1•••O2                                 | 3.490(3) | 2.826(3) | 135.20(2) | <i>x,y,z</i>                 |
| N2–H2•••O2                                 | 2.889(3) | 2.036(3) | 171.20(2) | <i>x,y,z</i>                 |
| C9–H9B•••O1                                | 3.452(4) | 2.579(2) | 151.24(2) | $-x, -y+1, -z+2$             |
| C9–H9B•••O3                                | 3.466(4) | 2.592(3) | 151.48(2) | $-x, -y+1, -z+2$             |
| C8–H8C•••O3                                | 3.679(7) | 2.781(3) | 156.03(3) | $-x, -y+2, -z+1$             |
| <b>AMT-TFA</b>                             |          |          |           |                              |
| N1–H1•••O1                                 | 2.643(3) | 1.784(3) | 176.16(2) | <i>x,y,z</i>                 |
| N2–H2•••O2                                 | 2.974(3) | 2.117(2) | 173.59(2) | <i>x,y,z</i>                 |
| N5–H5•••O2                                 | 3.146(4) | 2.361(3) | 151.98(2) | $x, -y+1/2, +z-1/2$          |
| C9–H9B•••F3                                | 3.634(7) | 2.859(4) | 138.44(3) | $x, -y+1/2, +z-1/2$          |
| C5–H5A•••F2                                | 3.347(7) | 2.594(4) | 135.52(3) | $x, -y+1/2, +z-1/2$          |
| C8–H8C•••F2                                | 3.655(6) | 2.834(3) | 143.96(3) | $-x+1, +y-1/2, -z+1/2+1$     |
| C7–H7A•••F2                                | 3.561(6) | 2.713(4) | 147.56(3) | $-x+1, +y-1/2, -z+1/2+1$     |
| C9–H9C•••O1                                | 3.786(6) | 2.828(3) | 175.58(3) | $-x+2, -y+1, -z+1$           |
| C5–H5B•••F1                                | 3.666(6) | 2.904(3) | 137.07(3) | $x-1, -y+1/2, +z-1/2$        |

**Table S3.** pK<sub>a</sub> values for atrazine, ametryn, and multicomponent formers

| Compound                          | pK <sub>a</sub>                |
|-----------------------------------|--------------------------------|
| Ametryn                           | 4.0 <sup>2</sup>               |
| Atrazine                          | 1.7 <sup>2,3</sup>             |
| Fumaric acid (H <sub>2</sub> Fum) | 3.03 and 4.44 <sup>4</sup>     |
| Nitric acid (HNO <sub>3</sub> )   | -1.5 <sup>5</sup>              |
| Trifluoroacetic acid (3FAH)       | 0.52 <sup>6</sup>              |
| Malic acid                        | 3.4, 5.2 and 14.5 <sup>7</sup> |
| Oxalic acid                       | 1.27 and 4.27 <sup>8</sup>     |

**Table S4.** Principal FT-IR bands (cm<sup>-1</sup>) for ATZ and AMT multicomponent crystals

| Assignment (cm <sup>-1</sup> )        | ATZ        | ATZ-H <sub>2</sub> Fum | AMT        | AMT-NO <sub>3</sub> | AMT-TFA    |
|---------------------------------------|------------|------------------------|------------|---------------------|------------|
| ν(N-H)                                | 3257, 3103 | 3269, 3210             | 3251, 3093 | 3261, 3095          | 3269, 3083 |
| ν(C-H)                                | 2972, 2931 | 2972, 2935             | 2968, 2933 | 2972, 2929          | 2981, 2939 |
| ν(C=O)                                | -          | 1701                   | -          | -                   | -          |
| ν(C <sub>3</sub> N <sub>3</sub> ring) | 1618, 1546 | 1620, 1558             | 1606, 1523 | 1658, 1612          | 1679, 1608 |
| ν(COO <sup>-</sup> )                  | -          | -                      | -          | -                   | 1559, 1443 |
| ν(C=N)                                | 1338       | 1344                   | 1334       | 1332                | 1346       |
| ν(NO <sub>3</sub> <sup>-</sup> )      | -          | -                      | -          | 1382, 1160          | -          |
| ν(C-S)                                | -          | -                      | 1001       | 999                 | 995        |
| δ(C-H)                                | 808        | 800                    | 806        | 806                 | 790        |
| ν(C-Cl)                               | 690        | 692                    | -          | -                   | -          |

**Table S5.** Equilibrium solubility values (mg mL<sup>-1</sup>) of ATZ cocrystal and AMT salts. The

ATZ and AMT were added for comparison purpose.

| Compound               | Solubility (mg mL <sup>-1</sup> ) |
|------------------------|-----------------------------------|
| ATZ                    | 0.682                             |
| ATZ-H <sub>2</sub> Fum | 3.88                              |
| AMT                    | 0.215                             |
| AMT-NO <sub>3</sub>    | 4.50                              |
| AMT-TFA                | 2.96                              |

**Figure S1.** View of the asymmetric unit (ASU) of (a) ATZ-Fum ( $C2/c$ ,  $Z'=1$ ), (b) ATZ-H<sub>2</sub>Fum.H<sub>2</sub>O ( $C2/c$ ,  $Z'=1$ ), (c) AMT-NO<sub>3</sub> ( $P\bar{1}$ ,  $Z'=1$ ), (d) AMT-3FA ( $P21/c$ ,  $Z'=1$ ).

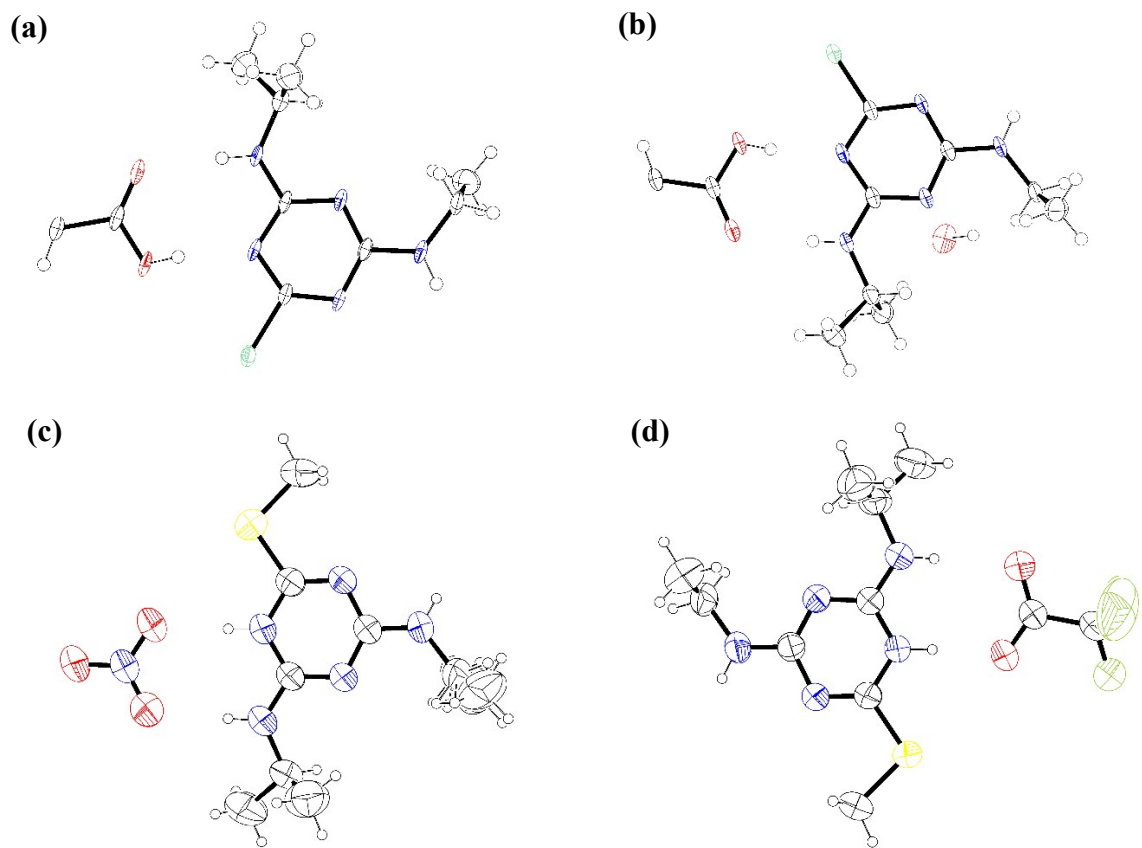

**Figure S2.** The isostructural packing of (a) ATZ-H<sub>2</sub>FumH<sub>2</sub>O and the (b) dehydrates ATZ-H<sub>2</sub>Fum. The coexistence of isostructural hydrate and dehydrated phases have identified as outcome of the crystallization. Notably, the ATZ-Fum H<sub>2</sub>O structure showed poor thermal stability, releasing the water molecules below 330 K converting into the isostructural dehydrate. This type of hydrate occurs owing to the structure formed be able to generate channels that allow the flow of water molecules with low retention.

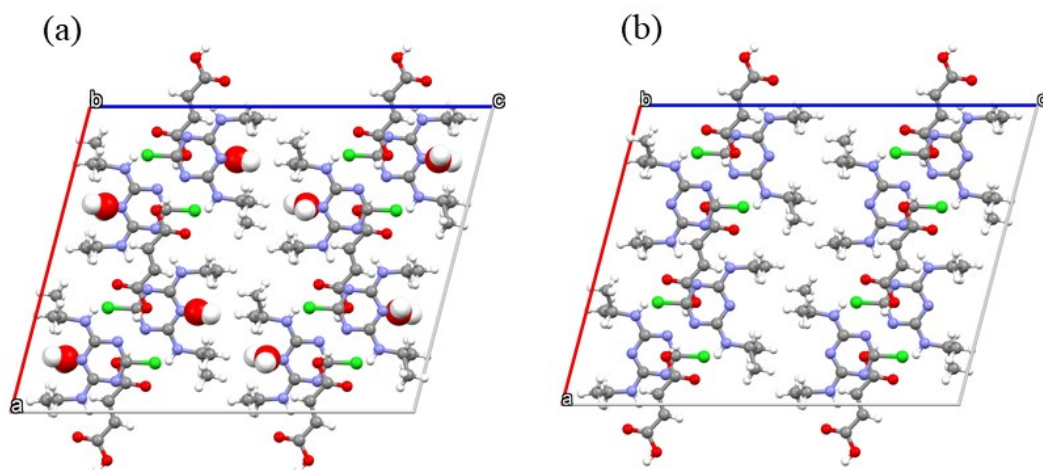

**Figure S3.** Fourier difference map for the neutral ATZ molecule in the (a) ATZ-H<sub>2</sub>Fum.H<sub>2</sub>O and (b) ATZ-H<sub>2</sub>Fum cocrystals. And for the AMT<sup>+</sup> cation in (c) AMT-NO<sub>3</sub> and (d) AMT-TFA salts. The cocrystal formation is confirmed by the non-protonation of COOH groups of the fumaric acid. In the ametryn salts, it has seen the protonation of AMT molecule on the N5-atom for both cases.

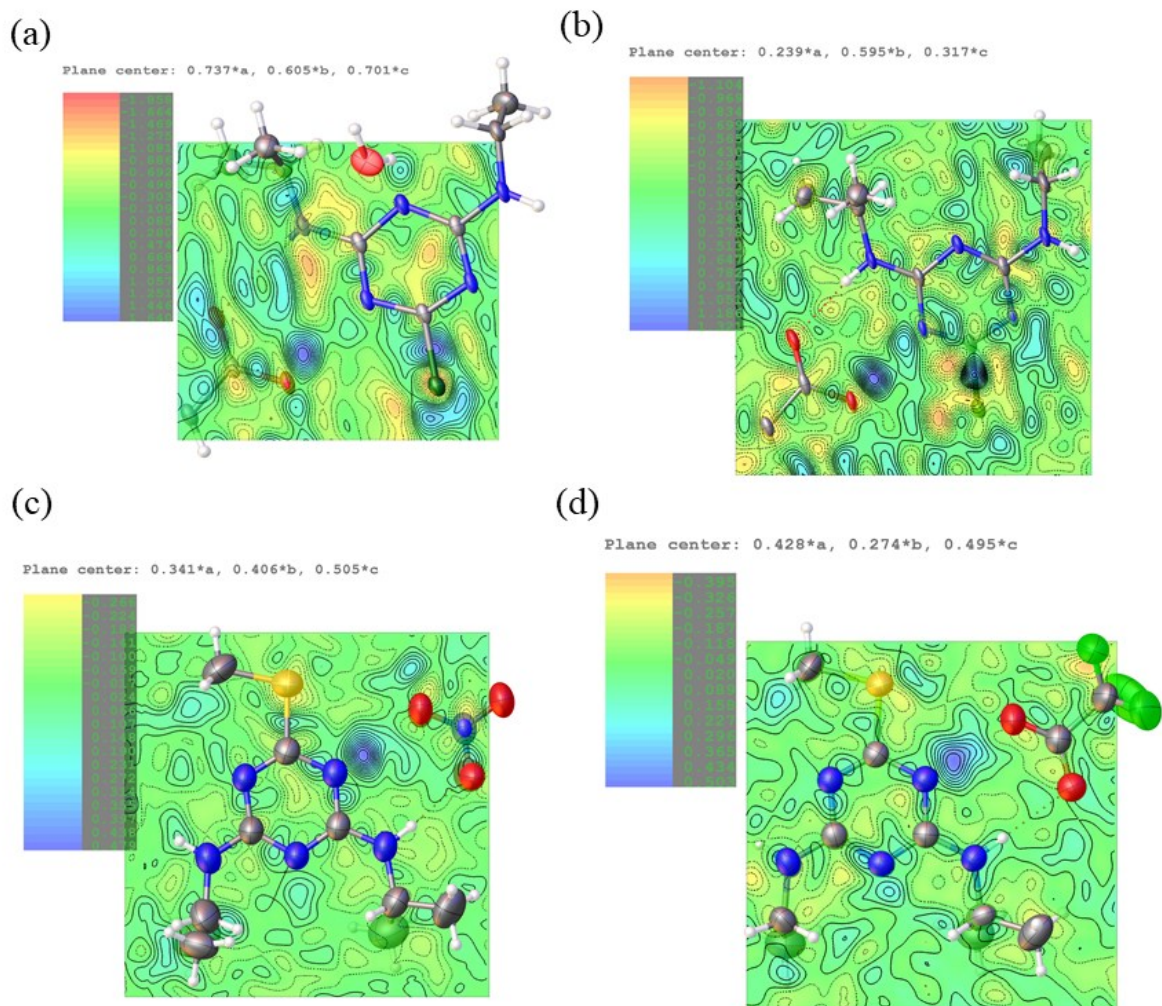

**Figure S4.** The ATZ-H<sub>2</sub>Fum-H<sub>2</sub>O parking. The association between the water and ATZ molecules are highlighted in the blue square.

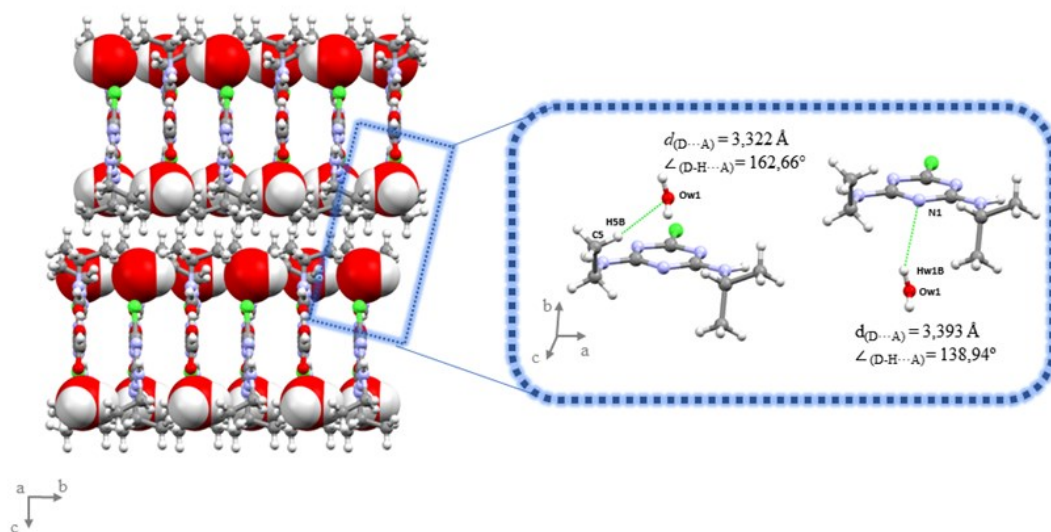

**Figure S5.** (a) The amino-triazine $\cdots$ H<sub>2</sub>Fum and amino-triazine $\cdots$ amino-triazine synthons along to axis 100. (b) projection of chains arranged in opposite positions along the axis 010 forming crystalline packaging.

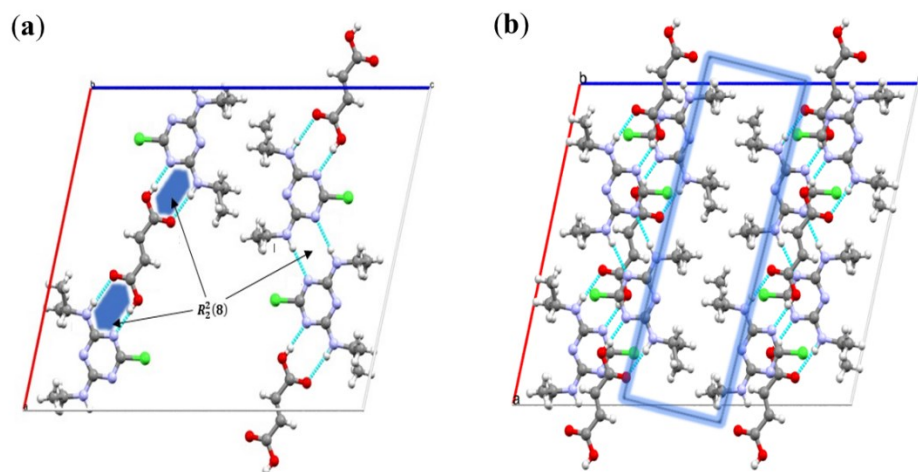

Supplement: d1ce00356a1.pdf [file d1ce00356a1.pdf]
